# Supplementary material
Source: PubMed Central journal article supplement (PMC6919251)
Supplement: Supp_Fig1.pdf [file Supp_Fig1.pdf]

## Supplementary Data

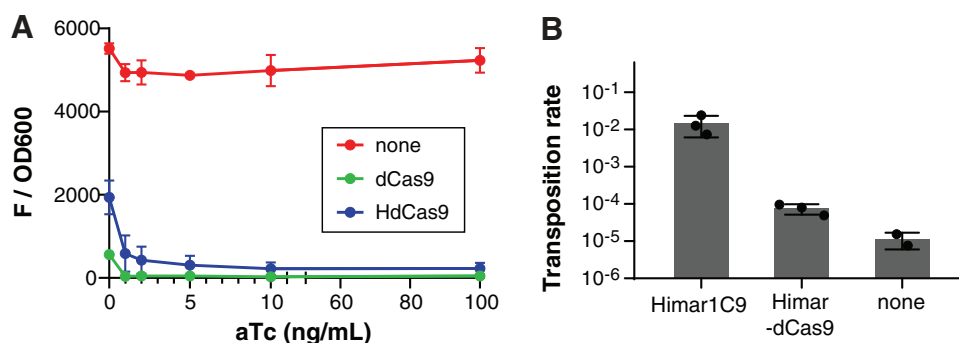

**SUPPLEMENTARY FIG. S1.** Himar1C9-dCas9 (Himar-dCas9) fusion protein retains DNA binding and transposition functionalities. **(A)** dCas9 and Himar-dCas9 were expressed in MG1655 *galk::mCherry-specR* *E. coli* with gRNAs 5 and 16. Protein expression was induced with aTc (0–100 ng/mL);  $n=3$  for each condition. Both proteins decreased mCherry expression compared with the parent strain, indicating that the Himar-dCas9 fusion protein bound to the mCherry gene specified by the gRNAs and blocked transcription. **(B)** The transposition rates of Himar1C9 and Himar-dCas9 (without gRNA) were measured in an *E. coli* conjugation assay ( $n=3$  for transposases,  $n=2$  for control). Both Himar1C9 and Himar-dCas9 mediated transposition at higher rates than the no-transposase control. Error bars indicate standard deviation.
