# Supplementary material
Source: PubMed Central journal article supplement (PMC6919251)
Supplement: Supp_Fig3.pdf [file Supp_Fig3.pdf]

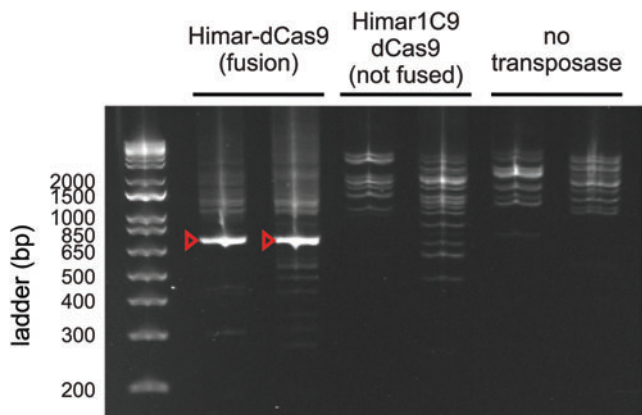

**SUPPLEMENTARY FIG. S3.** gRNA-directed transposition is a property of Himar-dCas9 fusion proteins but not unfused Himar1C9 and dCas9. *In vitro* transposition reactions containing purified Himar-dCas9 with gRNA\_4, Himar1C9 and dCas9 with gRNA\_4, or no transposase were analyzed by a PCR assay for transposon-target plasmid junctions. Target plasmid was pGT-B1 (2.27 nM), and transposon donor was pHimar6 (2.27 nM). All protein concentrations were 30 nM.
